# Supplementary material for: Risk of serious infections associated with use of immunosuppressive agents in pregnant women with autoimmune inflammatory conditions: cohort study
Source: PubMed Central journal article supplement — BMJ. 2017 Mar 6;356:j895. doi: 10.1136/bmj.j895 (PMC6168035; doi:10.1136/bmj.j895), 2017-03-06
Supplement: desr035067.ww1.pdf [file desr035067.ww1.pdf]

## Table of contents

|                  |                                                                                                                                                                                                                               |
|------------------|-------------------------------------------------------------------------------------------------------------------------------------------------------------------------------------------------------------------------------|
| <b>eFigure 1</b> | Study design                                                                                                                                                                                                                  |
| <b>eFigure 2</b> | Patient selection flow chart                                                                                                                                                                                                  |
| <b>eFigure 3</b> | Patterns of infection risk in each treatment group by the month of pregnancy in women with autoimmune inflammatory conditions, Medicaid data 2000-2010 and Optum Clinformatics data 2004-2015                                 |
| <b>eTable 1</b>  | The list of ICD-9 diagnosis codes and prescription immunosuppressive agents used to determine inclusion in this study                                                                                                         |
| <b>eTable 2</b>  | Covariate distribution among patients included in each comparison prior to propensity score weighting, Medicaid data 2000-2010 and Optum Clinformatics data 2004-2015                                                         |
| <b>eTable 3</b>  | Crude absolute and relative risk estimates for serious infections in pregnant women treated with immunosuppressive agents stratified by autoimmune conditions, Medicaid data 2000-2010 and Optum Clinformatics data 2004-2015 |
| <b>eTable 4</b>  | Covariate distribution among patients included in each comparison for autoimmune condition stratified analysis after to propensity score weighting, Medicaid data 2000-2010 and Optum Clinformatics data 2004-2015            |

**eFigure 1- Study design**

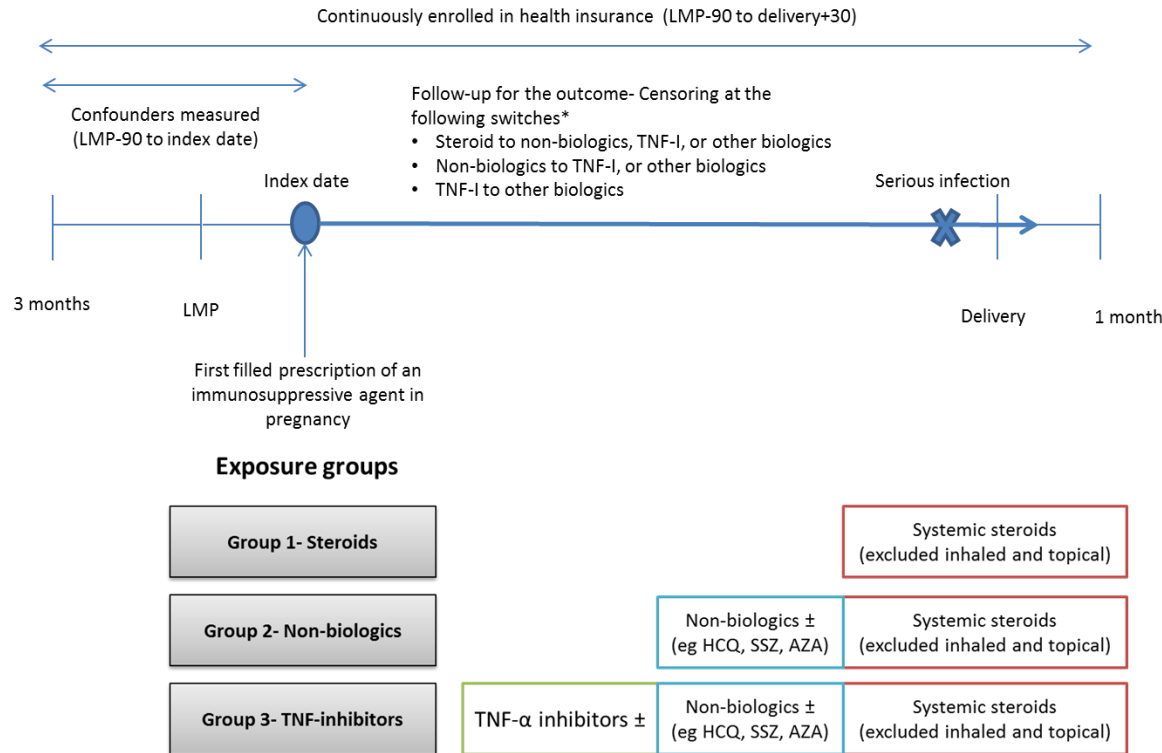

\* 277 out of 2,598 steroid users (10.6%) were censored upon filling subsequent prescriptions for non-biologics (234), TNF-inhibitors (37), or other biologics (6). 36 out of 1,587 non-biologic users (2.2%) were censored upon filling subsequent prescriptions for TNF-inhibitors (31), or other biologics (5). None of the TNF-inhibitor users subsequently filled other biologic prescriptions. **Abbreviations:** AZA- azathioprine, HCQ- hydroxychloroquine, LMP- last menstrual period, SSZ- sulfasalazine, TNF-I- Tumor necrosis factor inhibitors.

**Immunosuppressive agent use of each treatment group**

| Treatment group†        | Immunosuppressive agent use           | No. of patients |
|-------------------------|---------------------------------------|-----------------|
| Steroids (n=2,598)      | Steroids only                         | 2,598           |
|                         | Non-biologics only                    | 1,013 (63.8%)   |
| Non-biologics (n=1,587) | Non-biologics+steroids                | 574 (36.2%)     |
|                         | TNF-inhibitors only                   | 413 (53.2%)     |
| TNF-inhibitors (n=776)  | TNF-inhibitors+steroids               | 218 (28.1%)     |
|                         | TNF-inhibitors+non-biologics          | 75 (9.7%)       |
|                         | TNF-inhibitors+steroids+non-biologics | 70 (9.0%)       |
|                         |                                       |                 |

† Treatment group defined based on the first filled prescription during pregnancy. Subsequent immunosuppressive agent use identified any time in pregnancy based on filling of a prescription of an agent from the respective class after the prescription of the index exposure.

eFigure 2- Patient selection flow-chart

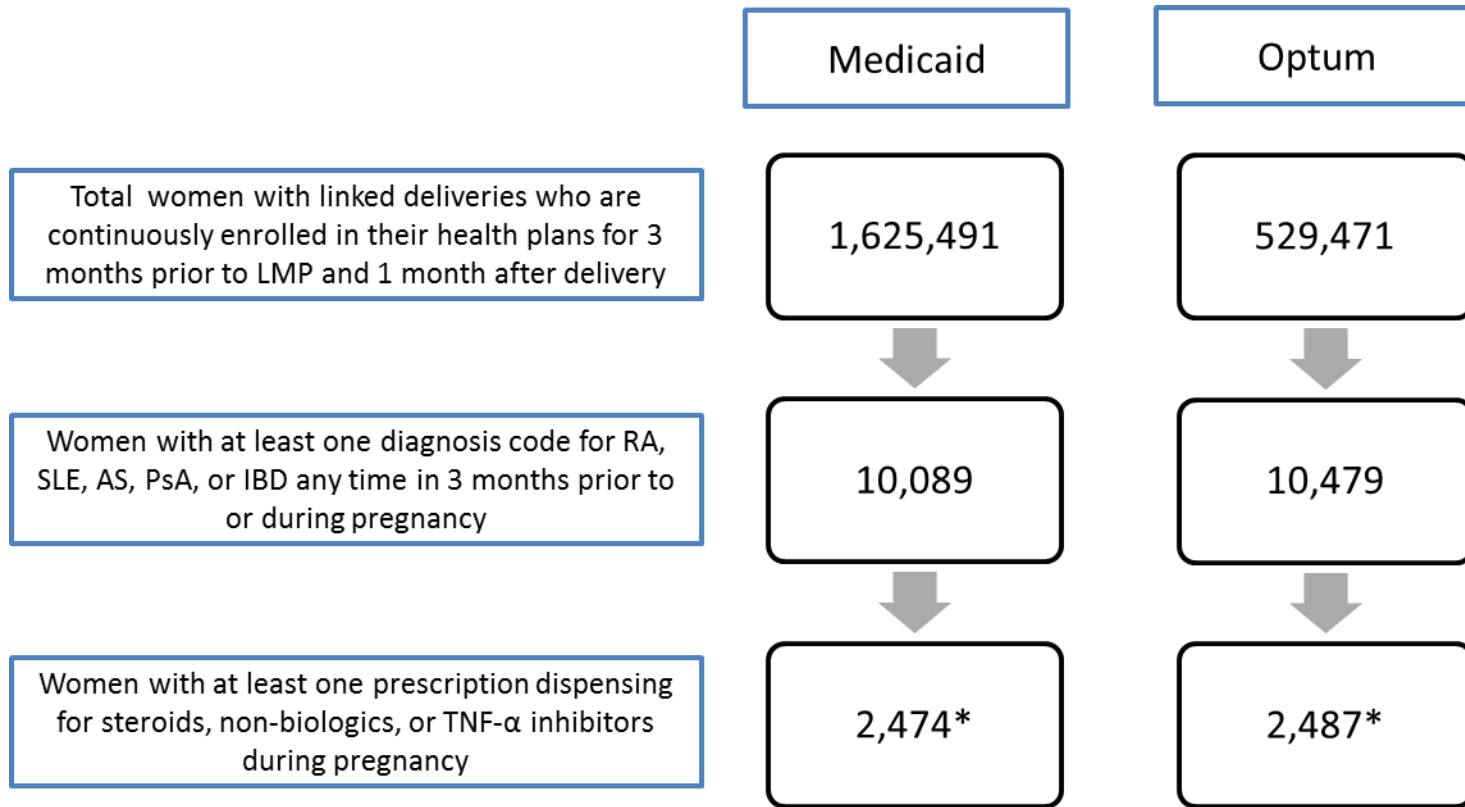

\* The total numbers of patients 4,961; of which 776 TNF-inhibitor users, 1,587 non-biologic users, and 2,598 steroid users (Table 1).

Abbreviations: AS- ankylosing spondylitis, IBD- inflammatory bowel disease, PsA- Psoriatic arthritis, RA- rheumatoid arthritis, SLE- systemic lupus erythematosus.

**eFigure 3- Patterns of infection risk in each treatment group by the month of pregnancy in women with autoimmune inflammatory conditions, Medicaid data 2000-2010 and Optum Clinformatics data 2004-2015**

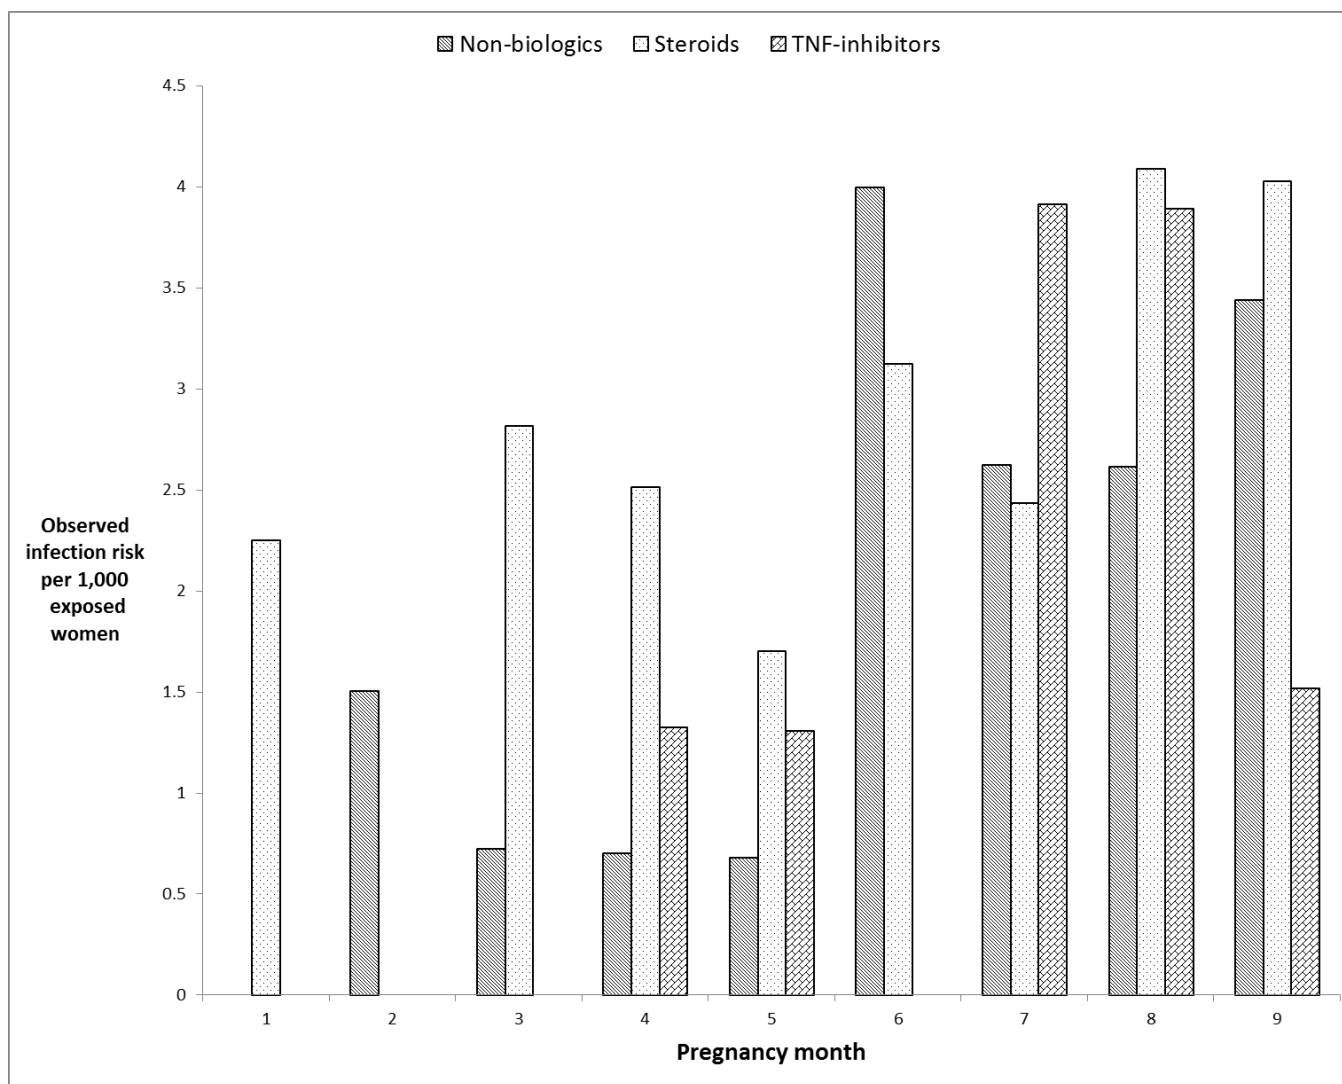

Infection risks calculated separately in the three treatment groups as a ratio of the total number of serious infection events to the total number of at-risk women under follow-up during each pregnancy month

**eTable 1- The list of ICD-9 diagnosis codes and prescription immunosuppressive agents used to determine inclusion in this study**

|                                                       |                                                                                                                                                                                                                                                               |
|-------------------------------------------------------|---------------------------------------------------------------------------------------------------------------------------------------------------------------------------------------------------------------------------------------------------------------|
| <i>Rheumatoid arthritis</i> diagnosis codes           | 714.xx                                                                                                                                                                                                                                                        |
| <i>Systemic lupus erythematosus</i> diagnosis codes   | 710.0x, 695.4x                                                                                                                                                                                                                                                |
| <i>Ankylosing spondylitis</i> diagnosis codes         | 720.xx                                                                                                                                                                                                                                                        |
| <i>Psoriatic arthritis</i> diagnosis codes            | 696.0x                                                                                                                                                                                                                                                        |
| <i>Inflammatory bowel disease</i> diagnosis codes     | 555.xx, 556.xx                                                                                                                                                                                                                                                |
| <i>Steroid agents included*</i>                       | prednisone, hydrocortisone, cortisone, prednisolone, methylprednisolone, dexamethasone, budesonide, triamcinolone, betamethasone                                                                                                                              |
| <i>Non-biologic disease modifying agents included</i> | <u>RA, AS, and PsA</u> : methotrexate, hydroxychloroquine, azathioprine, cyclosporine, leflunomide, minocycline, sulfasalazine.<br><br><u>SLE</u> : hydroxychloroquine, azathioprine, mycophenolate mofetil.<br><br><u>IBD</u> : azathioprine, mercaptopurine |
| <i>TNF-<math>\alpha</math> inhibitors included</i>    | adalimumab, certolizumab pegol, etanercept, golimumab, infliximab                                                                                                                                                                                             |

\* Only systemically administered steroids included, excluded if route of administration is topical or inhaled

**eTable 2- Covariate distribution among patients included in each comparison prior to propensity score weighting, Medicaid data 2000-2010 and Optum Clinformatics data 2004-2015**

|                                                                         | Patients with autoimmune inflammatory conditions* |                           |                  | Patients with autoimmune inflammatory conditions* other than SLE |                           |                  | Patients with autoimmune inflammatory conditions* other than SLE |                              |                  |
|-------------------------------------------------------------------------|---------------------------------------------------|---------------------------|------------------|------------------------------------------------------------------|---------------------------|------------------|------------------------------------------------------------------|------------------------------|------------------|
|                                                                         | <i>Non-biologics (n=1,587)</i>                    | <i>Steroids (n=2,598)</i> | <i>Std Diff†</i> | <i>TNF-inhibitors (n=776)</i>                                    | <i>Steroids (n=1,879)</i> | <i>Std Diff†</i> | <i>TNF-inhibitors (n=776)</i>                                    | <i>Non-biologics (n=816)</i> | <i>Std Diff†</i> |
| <b>Demographics</b>                                                     |                                                   |                           |                  |                                                                  |                           |                  |                                                                  |                              |                  |
| Age, years (Mean (SD))                                                  | 29 (6.1)                                          | 28 (6.2)                  | 10.7             | 30 (5.4)                                                         | 29 (6.2)                  | 28.4             | 30 (5.4)                                                         | 30 (5.9)                     | 11.7             |
| Region (n (%))                                                          |                                                   |                           |                  |                                                                  |                           |                  |                                                                  |                              | 3                |
| Midwest                                                                 | 426 (26.8)                                        | 731 (28.1)                | -2.9             | 235 (30.3)                                                       | 549 (29.2)                | 2.3              | 235 (30.3)                                                       | 236 (28.9)                   | -11.1            |
| Northeast                                                               | 275 (17.3)                                        | 394 (15.2)                | 5.9              | 104 (13.4)                                                       | 276 (14.7)                | -3.7             | 104 (13.4)                                                       | 142 (17.4)                   | 1.4              |
| South                                                                   | 582 (36.7)                                        | 983 (37.8)                | -2.4             | 279 (36)                                                         | 734 (39.1)                | -6.4             | 279 (36)                                                         | 288 (35.3)                   | 5                |
| West                                                                    | 304 (19.2)                                        | 490 (18.9)                | 0.8              | 158 (20.4)                                                       | 320 (17)                  | 8.6              | 158 (20.4)                                                       | 150 (18.4)                   |                  |
| Insurance type (n (%))                                                  |                                                   |                           |                  |                                                                  |                           |                  |                                                                  |                              |                  |
| Medicaid                                                                | 744 (46.9)                                        | 1534 (59)                 | -24.6            | 196 (25.3)                                                       | 1033 (55)                 | -63.6            | 196 (25.3)                                                       | 352 (43.1)                   | -38.4            |
| Optum Clinformatics                                                     | 843 (53.1)                                        | 1064 (41)                 | 24.6             | 580 (74.7)                                                       | 846 (45)                  | 63.6             | 580 (74.7)                                                       | 464 (56.9)                   | 38.4             |
| <b>Autoimmune inflammatory condition diagnoses (n (%))</b>              |                                                   |                           |                  |                                                                  |                           |                  |                                                                  |                              |                  |
| AS                                                                      | 45 (2.8)                                          | 480 (18.5)                | -52.4            | 58 (7.5)                                                         | 480 (25.5)                | -50.2            | 58 (7.5)                                                         | 45 (5.5)                     | 8                |
| PsA                                                                     | 17 (1.1)                                          | 44 (1.7)                  | -5.3             | 82 (10.6)                                                        | 44 (2.3)                  | 34               | 82 (10.6)                                                        | 17 (2.1)                     | 35.4             |
| RA                                                                      | 496 (31.3)                                        | 931 (35.8)                | -9.7             | 370 (47.7)                                                       | 931 (49.5)                | -3.7             | 370 (47.7)                                                       | 496 (60.8)                   | -26.5            |
| SLE                                                                     | 933 (58.8)                                        | 880 (33.9)                | 51.6             | 13 (1.7)                                                         | 161 (8.6)                 | -31.7            | 13 (1.7)                                                         | 162 (19.9)                   | -61.3            |
| IBD                                                                     | 295 (18.6)                                        | 494 (19)                  | -1.1             | 334 (43)                                                         | 494 (26.3)                | 35.8             | 334 (43)                                                         | 295 (36.2)                   | 14.1             |
| <b>Immunosuppressive medication use at baseline (n (%))<sup>#</sup></b> |                                                   |                           |                  |                                                                  |                           |                  |                                                                  |                              |                  |
| Steroids                                                                | 989 (38.1)                                        | 589 (37.1)                | 2.1              | 245 (31.6)                                                       | 720 (38.3)                | -14.1            | 245 (31.6)                                                       | 285 (34.9)                   | -7.0             |
| Non-biologics                                                           | 1,070 (67.4)                                      | 280 (10.8)                | 142.4            | 133 (17.1)                                                       | 154 (8.2)                 | 27.2             | 133 (17.1)                                                       | 489 (59.9)                   | -97.9            |
| TNF-inhibitors                                                          | 43 (2.7)                                          | 97 (3.7)                  | -5.7             | 682 (87.9)                                                       | 96 (5.1)                  | 297.6            | 682 (87.9)                                                       | 42 (5.1)                     | 297.6            |
| <b>Other medical conditions and medication use at baseline (n (%))</b>  |                                                   |                           |                  |                                                                  |                           |                  |                                                                  |                              |                  |

|                                                   |            |             |       |  |                  |            |       |  |                  |                  |       |
|---------------------------------------------------|------------|-------------|-------|--|------------------|------------|-------|--|------------------|------------------|-------|
| Anemia                                            | 139 (8.8)  | 229 (8.8)   | -0.2  |  | 45 (5.8)         | 155 (8.2)  | -9.6  |  | 45 (5.8)         | 71 (8.7)         | -11.2 |
| Chronic respiratory conditions                    | 23 (1.4)   | 107 (4.1)   | -16.3 |  | <11 <sup>‡</sup> | 86 (4.6)   | -20.6 |  | <11 <sup>‡</sup> | 11 (1.3)         | -1.7  |
| Pre-existing diabetes mellitus                    | 29 (1.8)   | 78 (3)      | -7.7  |  | <11 <sup>‡</sup> | 59 (3.1)   | -12.6 |  | <11 <sup>‡</sup> | 16 (2)           | -5.3  |
| Drug abuse or dependence                          | 43 (2.7)   | 164 (6.3)   | -17.4 |  | 11 (1.4)         | 126 (6.7)  | -27   |  | 11 (1.4)         | 29 (3.6)         | -13.8 |
| Renal disease                                     | 80 (5)     | 72 (2.8)    | 11.7  |  | <11 <sup>‡</sup> | 27 (1.4)   | -11.1 |  | <11 <sup>‡</sup> | 11 (1.3)         | -10.4 |
| Prior infections                                  | 17 (1.1)   | 34 (1.3)    | -2.2  |  | <11 <sup>‡</sup> | 26 (1.4)   | -10.7 |  | <11 <sup>‡</sup> | <11 <sup>‡</sup> | -8.3  |
| Insulin                                           | 18 (1.1)   | 58 (2.2)    | -8.5  |  | <11 <sup>‡</sup> | 42 (2.2)   | -10.7 |  | <11 <sup>‡</sup> | <11 <sup>‡</sup> | -0.8  |
| Oral hypoglycemic medications                     | 27 (1.7)   | 60 (2.3)    | -4.3  |  | <11 <sup>‡</sup> | 47 (2.5)   | -10   |  | <11 <sup>‡</sup> | 16 (2)           | -6.5  |
| Opioids                                           | 422 (26.6) | 1100 (42.3) | -33.6 |  | 193 (24.9)       | 853 (45.4) | -44   |  | 193 (24.9)       | 220 (27)         | -4.8  |
| Benzodiazepines                                   | 110 (6.9)  | 304 (11.7)  | -16.5 |  | 67 (8.6)         | 236 (12.6) | -12.8 |  | 67 (8.6)         | 61 (7.5)         | 4.3   |
| Antidepressants                                   | 286 (18)   | 580 (22.3)  | -10.7 |  | 131 (16.9)       | 435 (23.2) | -15.7 |  | 131 (16.9)       | 155 (19)         | -5.5  |
| Antihypertensive medications                      | 185 (11.7) | 241 (9.3)   | 7.8   |  | 34 (4.4)         | 140 (7.5)  | -13   |  | 34 (4.4)         | 67 (8.2)         | -15.8 |
| <b>Healthcare use characteristics (Mean (SD))</b> |            |             |       |  |                  |            |       |  |                  |                  |       |
| Number of distinct prescription medications       | 3 (2.9)    | 4 (3.4)     | -22   |  | 2 (2.8)          | 4 (3.5)    | -38.6 |  | 2 (2.8)          | 3 (2.8)          | -10.4 |
| Number of hospitalization                         | 0 (0.3)    | 0 (0.4)     | -18.1 |  | 0 (0.2)          | 0 (0.4)    | -22.3 |  | 0 (0.2)          | 0 (0.3)          | -6.7  |
| Number of outpatient visits                       | 6 (6.1)    | 9 (8.3)     | -36.5 |  | 6 (5.5)          | 9 (8.5)    | -45.5 |  | 6 (5.5)          | 6 (6.3)          | -7.4  |

Abbreviations--: AS- ankylosing spondylitis, IBD- inflammatory bowel disease, PsA- Psoriatic arthritis, RA- rheumatoid arthritis, SLE- systemic lupus erythematosus, Std Diff- Standardized difference, SD- Standard deviation, TNF- tumor necrosis factor

\*Autoimmune inflammatory conditions included ankylosing spondylitis, inflammatory bowel disease, psoriatic arthritis, rheumatoid arthritis, and systemic lupus erythematosus (SLE). For the comparisons involving TNF-inhibitors, we excluded patients with only SLE as TNF-inhibitors are not indicated for the treatment of SLE.

†Standardized difference values of 10 or greater indicate substantial imbalance in a particular covariate between the two treatment groups.

‡Actual numbers suppressed as required per data use agreement with the Centers for Medicare and Medicaid Services for counts <11.

# Not included in the propensity score models

**eTable 3- Crude absolute and relative risk estimates for serious infections in pregnant women treated with immunosuppressive agents stratified by autoimmune conditions, Medicaid data 2000-2010 and Optum Clinformatics data 2004-2015**

| Population and drug exposure                                             | Number of exposed pregnancies | Person-years | Serious infection events | Incidence rate/100 person-years (95% CI) | Incidence rate difference/100 person-years (95% CI) | Incidence rate ratio (95% CI) |
|--------------------------------------------------------------------------|-------------------------------|--------------|--------------------------|------------------------------------------|-----------------------------------------------------|-------------------------------|
| <b>Inflammatory bowel disease</b>                                        |                               |              |                          |                                          |                                                     |                               |
| Steroid                                                                  | 494                           | 196          | <11†                     | <11†                                     | Ref                                                 | Ref                           |
| Non-biologics                                                            | 295                           | 180          | <11†                     | <11†                                     | -0.3 (-4.1,3.5)                                     | 0.92 (0.31,2.74)              |
| TNF-inhibitors                                                           | 334                           | 224          | <11†                     | <11†                                     | -1.8 (-5,1.4)                                       | 0.5 (0.15,1.71)               |
| <b>Rheumatoid arthritis, psoriatic arthritis, ankylosing spondylitis</b> |                               |              |                          |                                          |                                                     |                               |
| Steroid                                                                  | 1385                          | 659          | 22                       | 3.3 (2.1,5.1)                            | Ref                                                 | Ref                           |
| Non-biologics                                                            | 521                           | 329          | <11†                     | <11†                                     | -2.1 (-3.9,-0.3)                                    | 0.36 (0.12,1.04)              |
| TNF-inhibitors                                                           | 442                           | 299          | <11†                     | <11†                                     | -2.0 (-3.9,-0.1)                                    | 0.39 (0.13,1.13)              |
| <b>Systemic lupus erythamatosus</b>                                      |                               |              |                          |                                          |                                                     |                               |
| Steroid                                                                  | 719                           | 306          | 11                       | 3.6 (1.8,6.4)                            | Ref                                                 | Ref                           |
| Non-biologics                                                            | 771                           | 482          | 13                       | 2.7 (1.4,4.6)                            | -0.9 (-3.5,1.7)                                     | 0.75 (0.34,1.67)              |

Abbreviations: CI- Confidence interval, IBD- inflammatory bowel disease, RA- rheumatoid arthritis, SpA- Spondyloarthritis (includes Psoriatic arthritis and ankylosing spondylitis), TNF- tumor necrosis factor

\*Serious infections- A composite outcome consisting of hospitalized bacterial (meningitis, encephalitis, cellulitis, endocarditis, pneumonia, pyelonephritis, osteomyelitis, and bacteremia) or opportunistic infections (tuberculosis, systemic candidiasis, cryptococcosis, aspergillosis)

† Actual numbers and rates suppressed as required per data use agreement with the Centers for Medicare and Medicaid Services for counts <11.



**eTable 4- Covariate distribution among patients included in each comparison for autoimmune condition stratified analysis after to propensity score weighting, Medicaid data 2000-2010 and Optum Clinformatics data 2004-2015**

|                                                                    | Non-biologics vs steroids |            |               |             |               |            | TNF-inhibitors vs steroids |            |                |             | TNF-inhibitors vs non-biologics |               |                |               |
|--------------------------------------------------------------------|---------------------------|------------|---------------|-------------|---------------|------------|----------------------------|------------|----------------|-------------|---------------------------------|---------------|----------------|---------------|
|                                                                    | IBD                       |            | RA, PsA, AS   |             | SLE           |            | IBD                        |            | RA, PsA, AS    |             | IBD                             |               | RA, PsA, AS    |               |
|                                                                    | Non-biologics             | Steroids   | Non-biologics | Steroids    | Non-biologics | Steroids   | TNF-inhibitors             | Steroids   | TNF-inhibitors | Steroids    | TNF-inhibitors                  | Non-biologics | TNF-inhibitors | Non-biologics |
| <b>Total</b>                                                       | <b>271</b>                | <b>444</b> | <b>516</b>    | <b>1281</b> | <b>703</b>    | <b>704</b> | <b>260</b>                 | <b>392</b> | <b>441</b>     | <b>1186</b> | <b>322</b>                      | <b>232</b>    | <b>402</b>     | <b>499</b>    |
| <b>Demographics</b>                                                |                           |            |               |             |               |            |                            |            |                |             |                                 |               |                |               |
| Age (mean years (SD))                                              | 29 (6.1)                  | 29 (5.7)   | 30 (5.8)      | 31 (6)      | 28 (6.2)      | 28 (6.2)   | 30 (4.9)                   | 29 (5.7)   | 31 (5.8)       | 31 (6.1)    | 29 (5.2)                        | 29 (5.7)      | 31 (5.9)       | 31 (5.3)      |
| Region (%)                                                         |                           |            |               |             |               |            |                            |            |                |             |                                 |               |                |               |
| Midwest                                                            | 34.7                      | 35.2       | 25.4          | 26.0        | 25.0          | 22.9       | 31.9                       | 33.8       | 25.6           | 25.5        | 34.8                            | 36.6          | 25.6           | 25.9          |
| Northeast                                                          | 17.3                      | 18.8       | 17.4          | 17.0        | 17.4          | 18.1       | 12.3                       | 13.0       | 15.9           | 17.7        | 15.7                            | 15.9          | 15.2           | 16.5          |
| South                                                              | 36.9                      | 34.7       | 34.7          | 34.6        | 37.1          | 36.0       | 40.0                       | 42.4       | 32.7           | 30.6        | 40.6                            | 36.2          | 32.8           | 29.8          |
| West                                                               | 11.1                      | 11.3       | 22.5          | 22.4        | 20.5          | 23.0       | 15.8                       | 10.8       | 25.9           | 26.2        | 8.9                             | 11.2          | 26.4           | 27.8          |
| Insurance type (%)                                                 |                           |            |               |             |               |            |                            |            |                |             |                                 |               |                |               |
| Medicaid                                                           | 39.5                      | 38.7       | 46.1          | 46.2        | 53.9          | 54.4       | 24.6                       | 28.2       | 29.0           | 26.1        | 36.9                            | 34.5          | 30.6           | 31.3          |
| Optum Clinformatics                                                | 60.5                      | 61.3       | 53.9          | 53.8        | 46.1          | 45.6       | 75.4                       | 71.8       | 71.0           | 73.9        | 63.1                            | 65.5          | 69.4           | 68.7          |
| <b>Other medical conditions and medication use at baseline (%)</b> |                           |            |               |             |               |            |                            |            |                |             |                                 |               |                |               |
| Anemia                                                             | 10.7                      | 10.0       | 6.0           | 6.1         | 8.7           | 9.0        | 10.4                       | 9.8        | <11†           | 1.9         | 14.1                            | 12.1          | 2.5            | 2.2           |
| Chronic respiratory conditions                                     | <11†                      | <11†       | <11†          | <11†        | 1.6           | 2.0        | <11†                       | <11†       | <11†           | 1.2         | <11†                            | <11†          | <11†           | <11†          |
| Pre-existing diabetes mellitus                                     | <11†                      | <11†       | 2.5           | 3.1         | 1.6           | 1.4        | <11†                       | <11†       | <11†           | 1.1         | <11†                            | <11†          | <11†           | <11†          |
| Drug abuse or dependence                                           | 4.8                       | 4.4        | 2.9           | 2.8         | 2.0           | 1.9        | <11†                       | <11†       | <11†           | 0.9         | <11†                            | <11†          | <11†           | <11†          |
| Renal disease                                                      | <11†                      | <11†       | <11†          | 2.1         | 8.3           | 12.1       | <11†                       | <11†       | <11†           | <11†        | <11†                            | <11†          | <11†           | <11†          |
| Prior serious infections                                           | <11†                      | <11†       | <11†          | <11†        | <11†          | 2.2        | <11†                       | <11†       | <11†           | <11†        | <11†                            | <11†          | <11†           | <11†          |
| Insulin                                                            | <11†                      | <11†       | <11†          | <11†        | <11†          | <11†       | <11†                       | <11†       | <11†           | 1.3         | <11†                            | <11†          | <11†           | <11†          |
| Oral hypoglycemic medications                                      | <11†                      | <11†       | 2.3           | 2.5         | <11†          | <11†       | <11†                       | <11†       | <11†           | 1.0         | <11†                            | <11†          | <11†           | <11†          |
| Opioids                                                            | 21.4                      | 17.5       | 31.0          | 31.8        | 27.3          | 26.7       | 27.7                       | 36.8       | 23.6           | 22.8        | 22.1                            | 20.7          | 23.4           | 22.1          |
| Benzodiazepines                                                    | 9.2                       | 6.8        | 6.6           | 7.1         | 6.5           | 6.4        | 9.6                        | 11.0       | 7.9            | 7.6         | 9.3                             | 10.8          | 6.5            | 7.1           |
| Antidepressants                                                    | 16.2                      | 17.7       | 20.5          | 21.4        | 17.1          | 16.2       | 18.8                       | 18.3       | 15.4           | 13.2        | 17.6                            | 16.8          | 15.2           | 15.9          |

|                                                          |           |           |           |         |           |           |           |           |           |           |           |           |           |           |
|----------------------------------------------------------|-----------|-----------|-----------|---------|-----------|-----------|-----------|-----------|-----------|-----------|-----------|-----------|-----------|-----------|
| Antihypertensive medications                             | <11†      | <11†      | 10.5      | 10.0    | 15.5      | 16.5      | 5.4       | 7.1       | 3.6       | 3.3       | 2.9       | 3.4       | 3.7       | 3.1       |
| <b>Healthcare use characteristics (mean number (SD))</b> |           |           |           |         |           |           |           |           |           |           |           |           |           |           |
| distinct prescription medications                        | 2 (2.5)   | 2 (2.5)   | 3 (3)     | 3 (2.8) | 3 (3)     | 3 (2.7)   | 3 (2.9)   | 3 (3)     | 2 (2.8)   | 2 (2.7)   | 3 (3.4)   | 2 (2.5)   | 2 (2.7)   | 3 (2.6)   |
| hospitalizations                                         | 0.1 (0.4) | 0.1 (0.3) | 0.1 (0.2) | 0 (0.2) | 0.1 (0.3) | 0.1 (0.3) | 0.1 (0.4) | 0.1 (0.3) | 0.1 (0.1) | 0.1 (0.1) | 0.1 (0.4) | 0.1 (0.4) | 0.1 (0.1) | 0.1 (0.1) |
| outpatient visits                                        | 6 (6.1)   | 6 (7)     | 6 (6.5)   | 6 (5.9) | 6 (6)     | 6 (6)     | 7 (5.7)   | 8 (8.7)   | 5 (5.5)   | 5 (5.6)   | 7 (5.3)   | 6 (6.3)   | 5 (5.7)   | 6 (5.2)   |

† Actual numbers and proportions suppressed as required per data use agreement with the Centers for Medicare and Medicaid Services for counts <11.
